# Supplementary material for: 3-NO2-5,10,15-triarylcorrolato-Cu as a versatile platform for synthesis of novel 3-functionalized corrole derivatives
Source: Royal Society of Chemistry journal article supplement (doi:10.1039/c4ob01247j), 2014-01-01
Supplement: c4ob01247j1.pdf [file c4ob01247j1.pdf]

## Electronic Supplementary Information

### **3-NO<sub>2</sub>-5,10,15-triarylcorrolato-Cu as a versatile platform for synthesis of novel 3-functionalized corrole derivatives**

Manuela Stefanelli,<sup>a</sup> Marco Mancini,<sup>a</sup> Michele Raggio,<sup>a</sup> Sara Nardis,<sup>\*a</sup> Frank R. Fronczek,<sup>b</sup> Gregory McCandless,<sup>b,c</sup> Kevin M. Smith,<sup>b</sup> and Roberto Paolesse<sup>a</sup>

[nardis@scienze.uniroma2.it](mailto:nardis@scienze.uniroma2.it);

<sup>a</sup> *Dipartimento di Scienze e Tecnologie Chimiche, Università di Roma Tor Vergata, via della Ricerca Scientifica 1, 00133 Rome, Italy*

<sup>b</sup> *Department of Chemistry, Louisiana State University, Baton Rouge, LA 70803, USA*

<sup>c</sup> *Department of Chemistry, The University of Texas at Dallas, Richardson, TX 75080, USA*

**Copies of <sup>1</sup>H NMR and IR spectra**

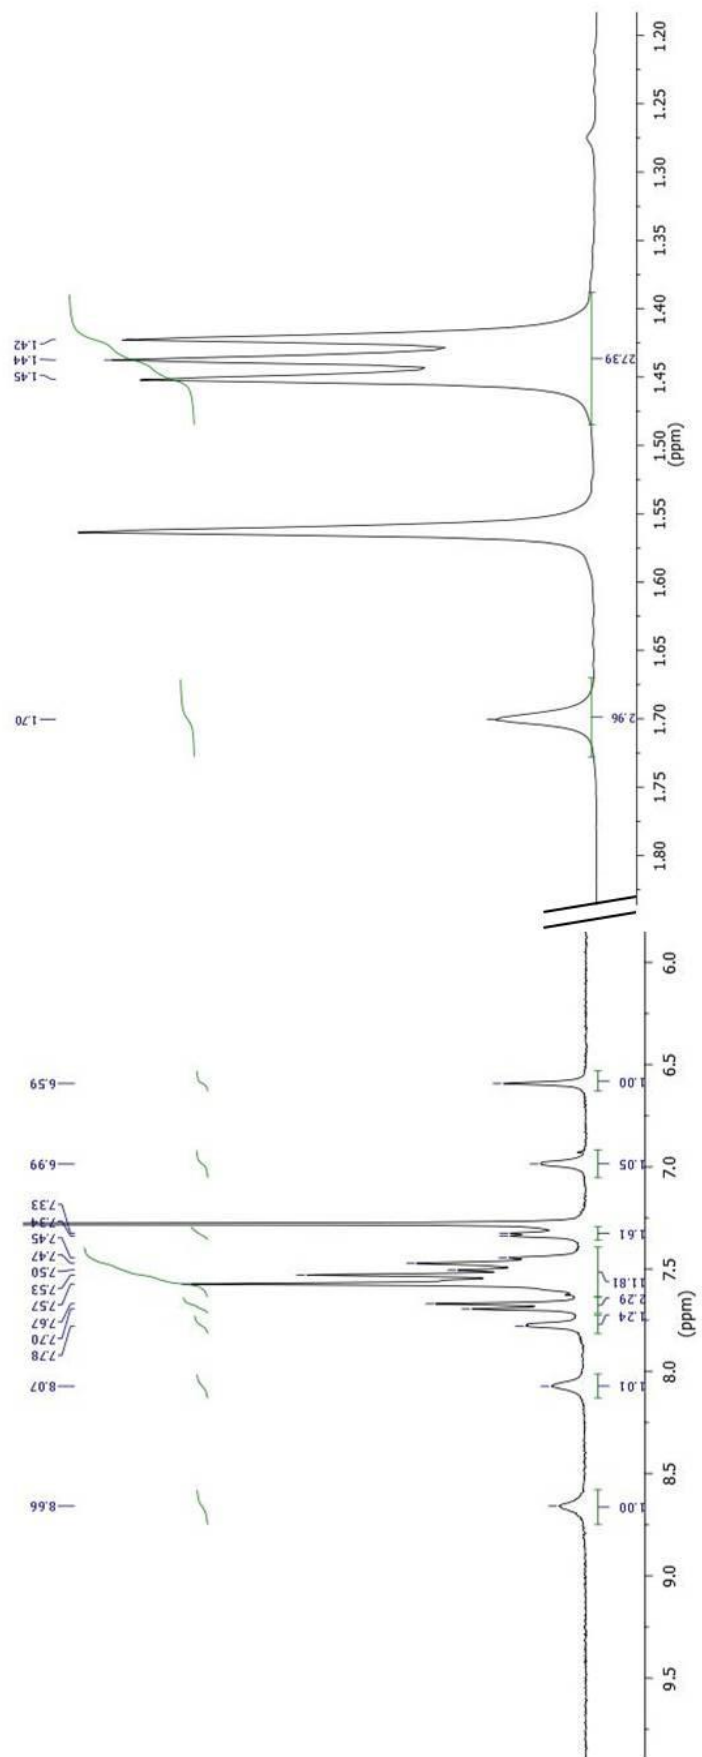

**Figure S1:**  $^1\text{H}$  NMR spectrum of 3-NHC(O)CH<sub>3</sub>-TtBuCorrCu(2)

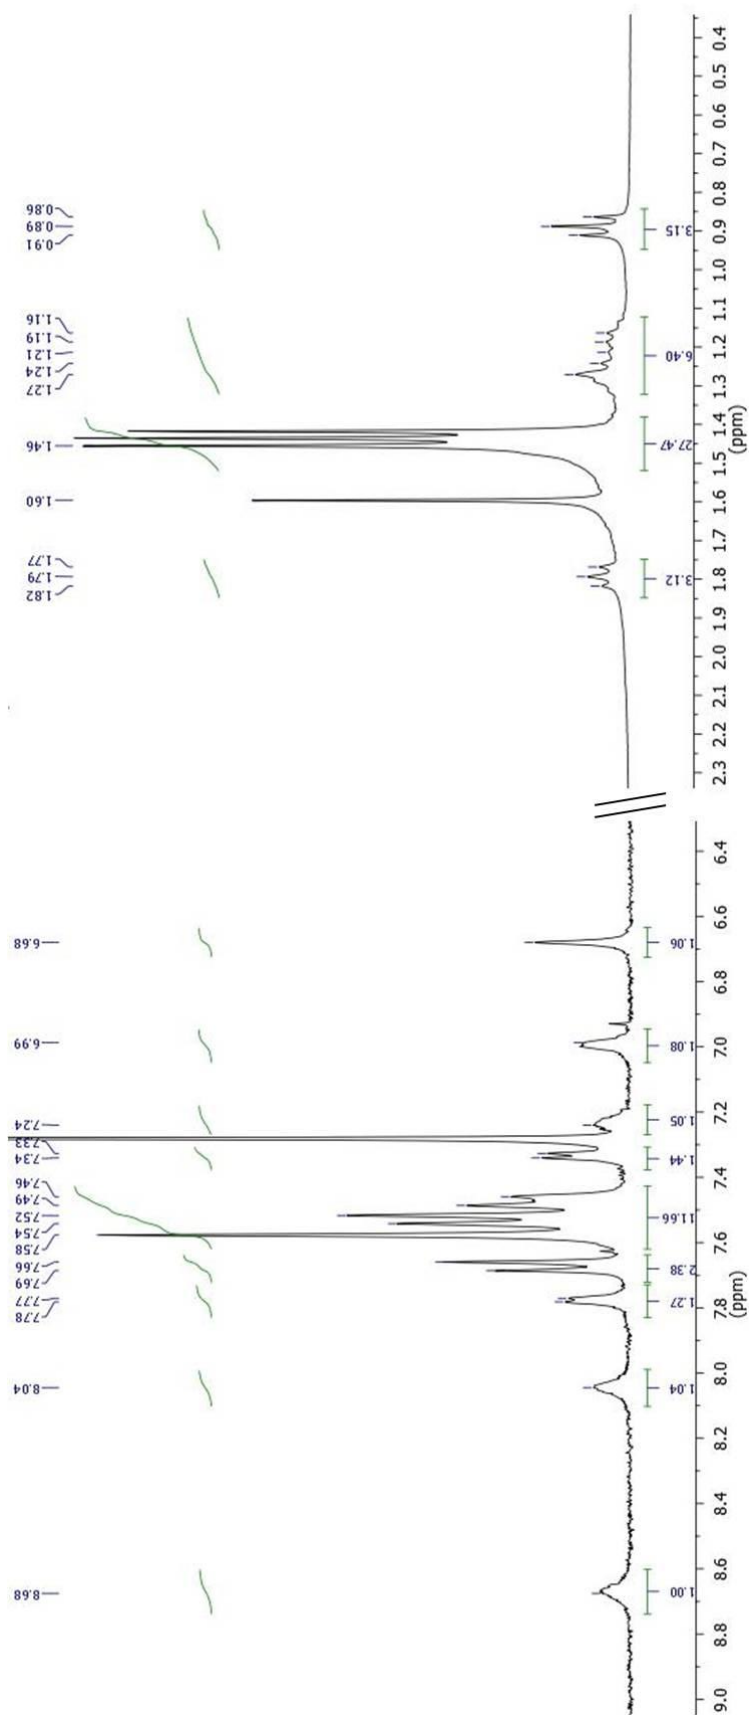

**Figure S2:**  $^1\text{H}$  NMR spectrum of 3-[NHC(O)(CH<sub>2</sub>)<sub>4</sub>CH<sub>3</sub>]-TtBuCorrCu(3)

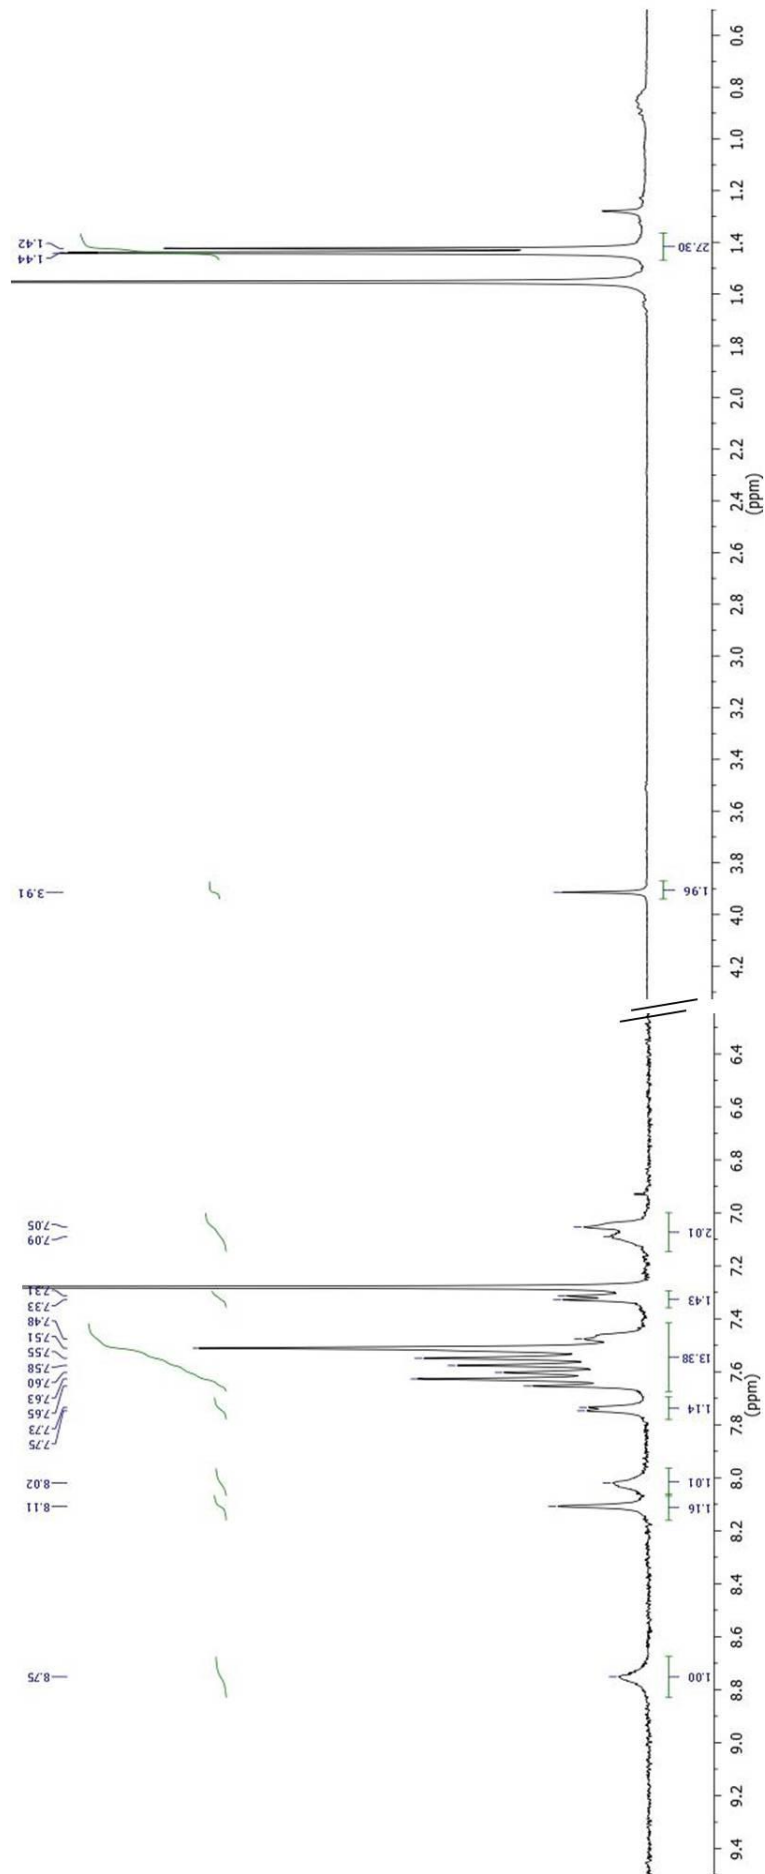

**Figure S3:**  $^1\text{H}$  NMR spectrum of 3-NHC(O)CH<sub>2</sub>Cl-TtBuCorrCu(4)

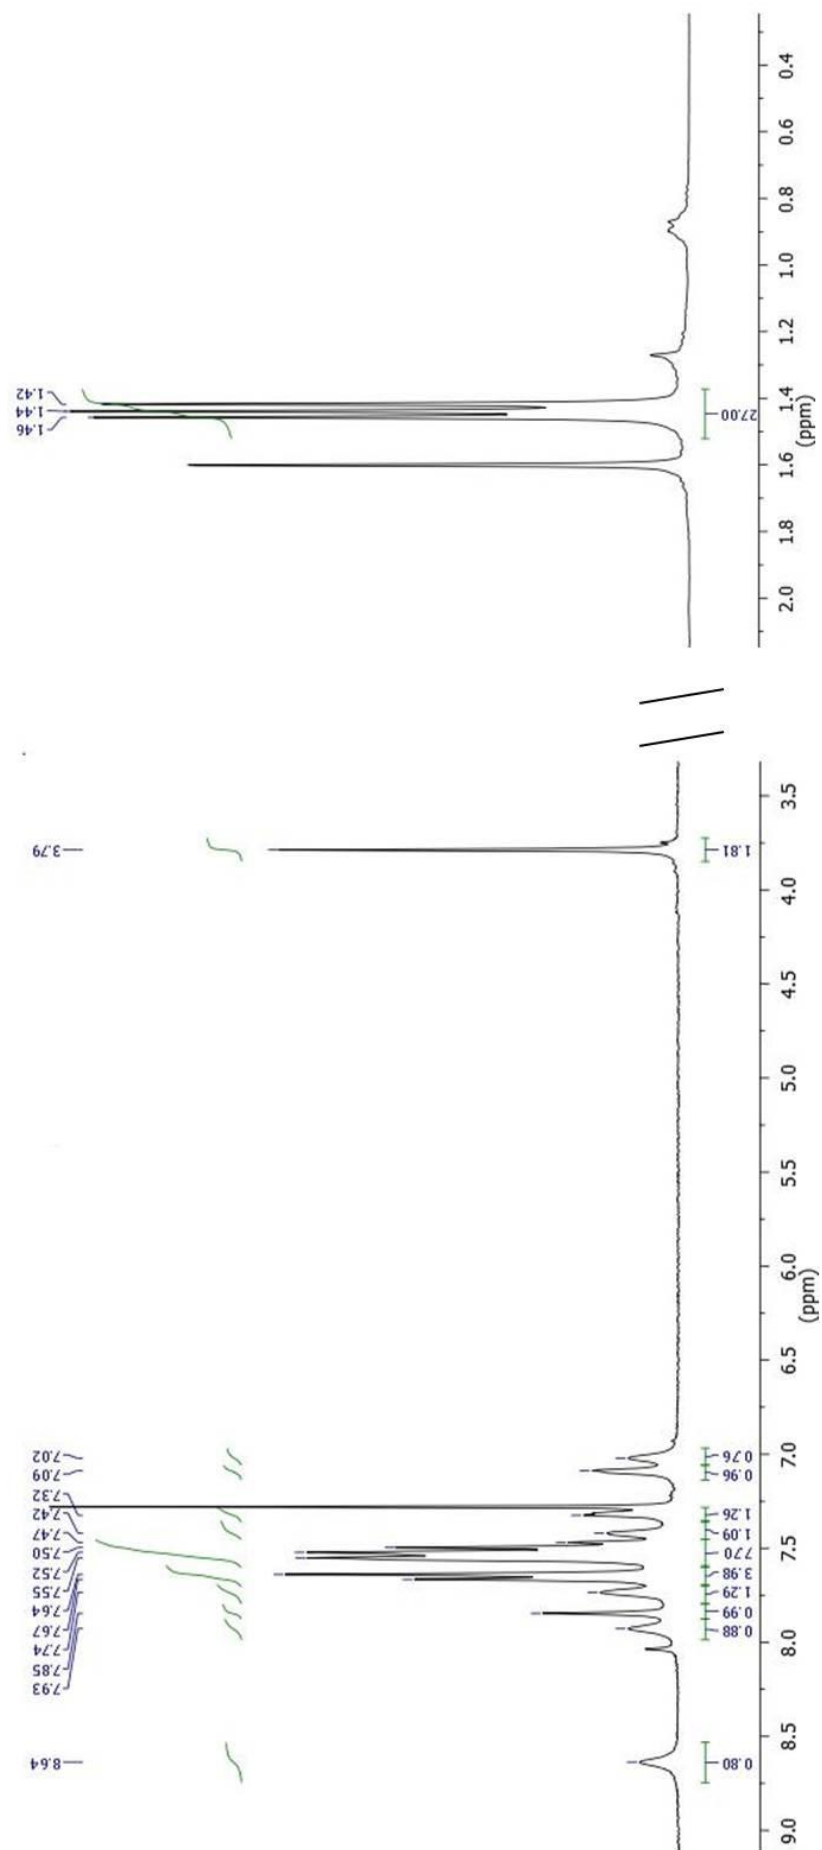

**Figure S4:**  $^1\text{H}$  NMR spectrum of 3-NHC(O)CH<sub>2</sub>N<sub>3</sub>-TtBuCorrCu(5)

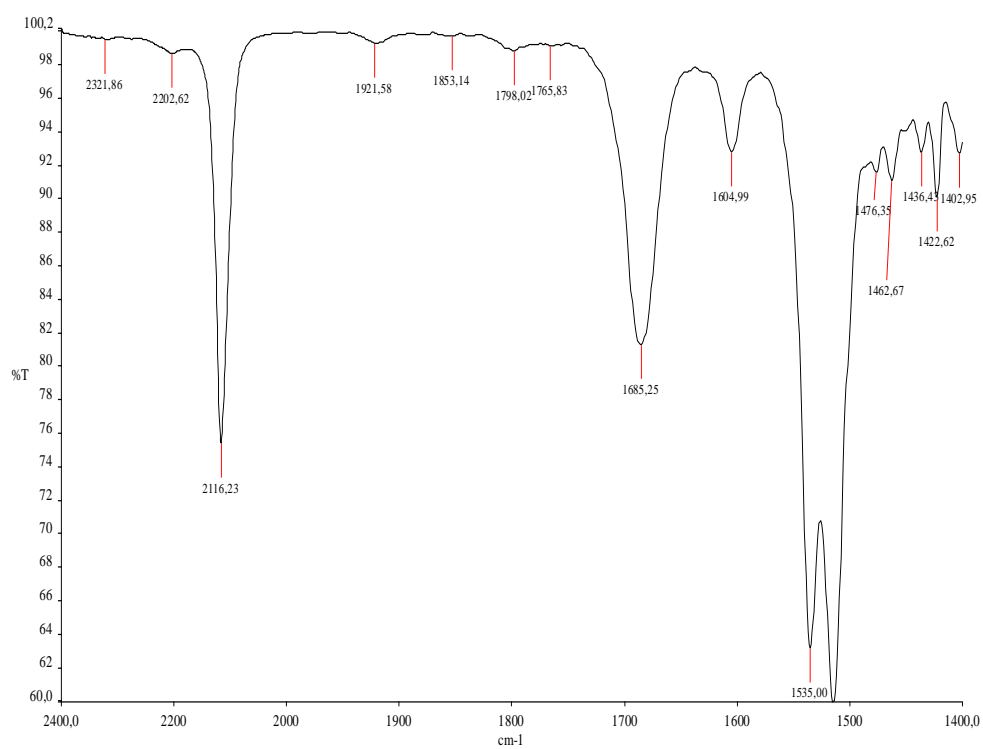

**Figure S5:** IR spectrum of 3-NHC(O)CH<sub>2</sub>N<sub>3</sub>-TtBuCorrCu(5)

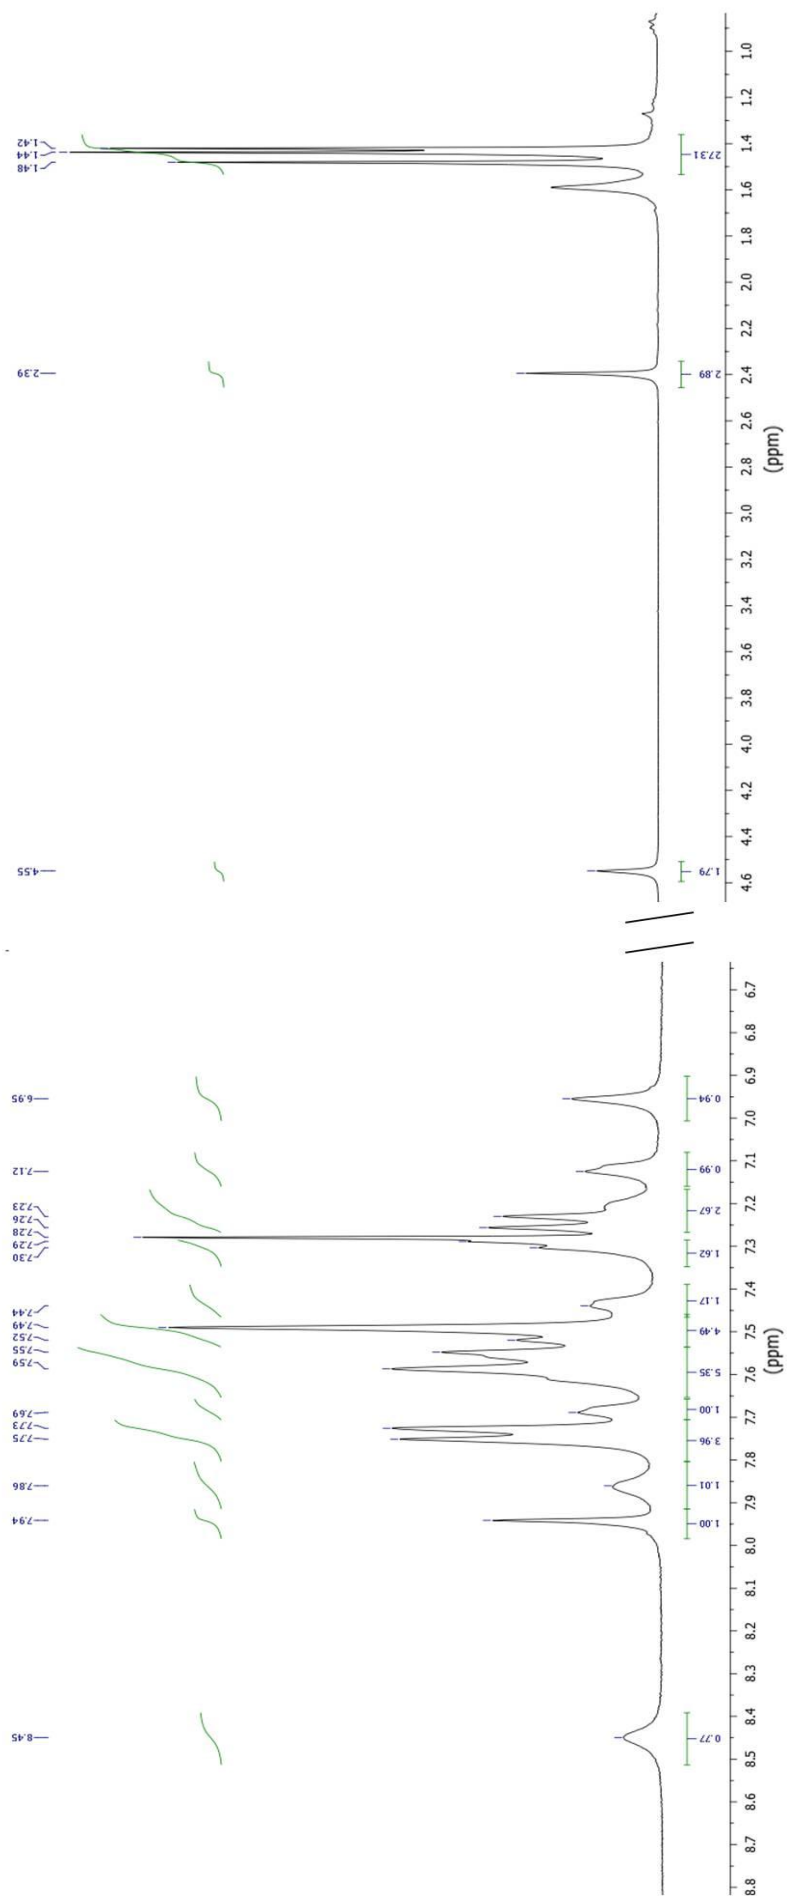

**Figure S6:** <sup>1</sup>H NMR spectrum of 3-NHC(O)CH<sub>2</sub>(4-tolyl-triazole)TtBuCorrCu(6)

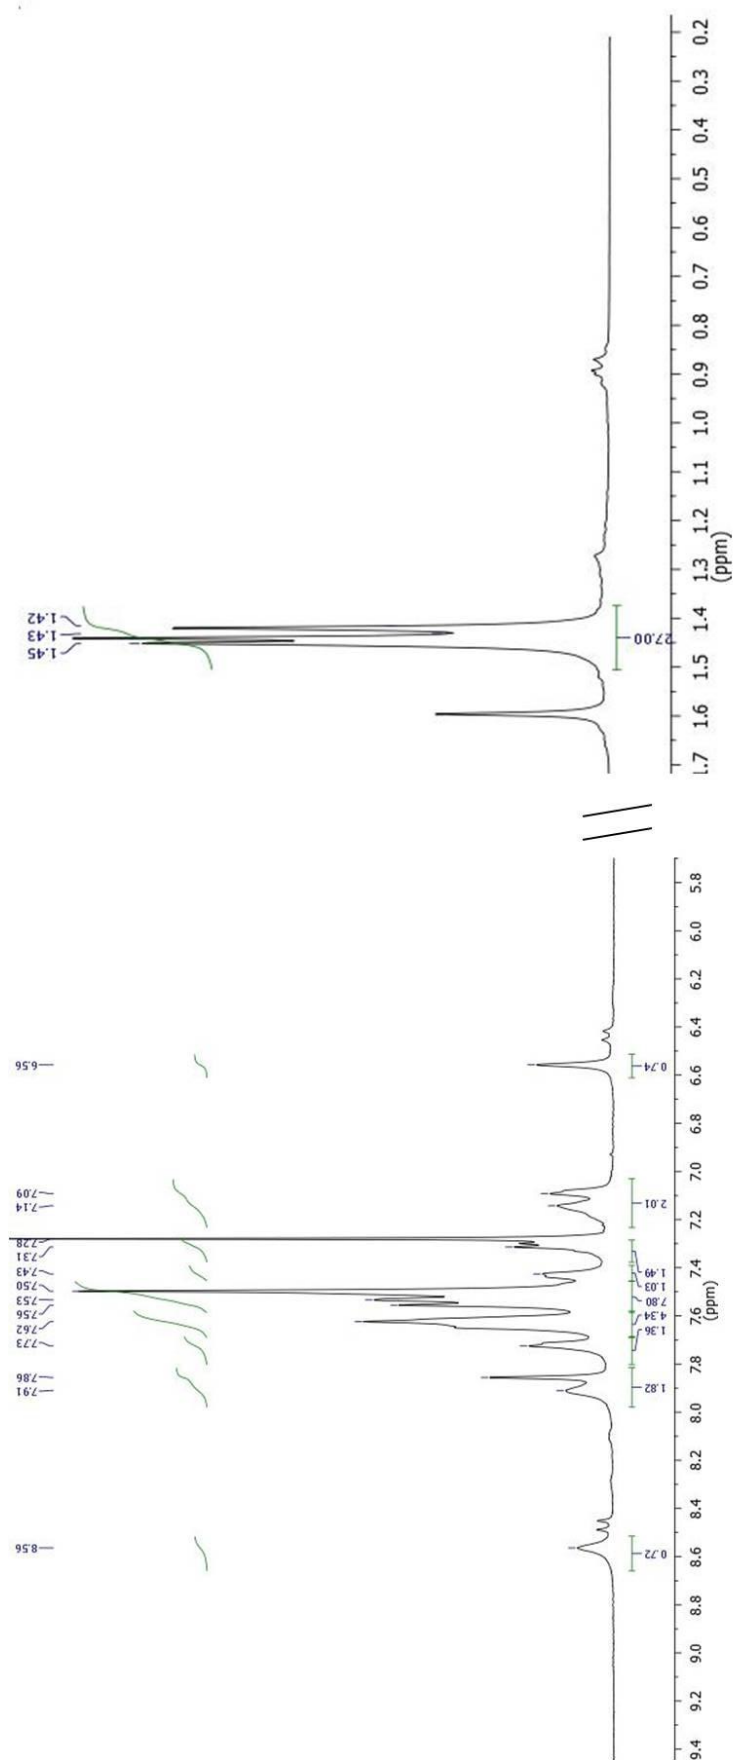

**Figure S6:**  $^1\text{H}$  NMR spectrum of 3-NHC(O)H-TtBuCorrCu(7)
